# Supplementary material
Source: PubMed Central journal article supplement (PMC5244294)
Supplement: AEM.02747-16_zam999117648s1.pdf [file AEM.02747-16_zam999117648s1.pdf]

1 **Oral administration of a select mixture of *Bacillus* probiotics**  
2 **affects the gut microbiota and goblet cell function in newly**  
3 **weaned *MUC4* resistant pigs**  
4 **following *Escherichia coli* challenge**

5 **Wei Zhang,<sup>a</sup> Yao-Hong Zhu,<sup>a,#</sup> Dong Zhou,<sup>a</sup> Qiong Wu,<sup>a</sup> Dan Song,<sup>a</sup> Johan Dicksved,<sup>b</sup>**

6 **Jiu-Feng Wang<sup>a</sup>**

7 Department of Veterinary Clinical Sciences, College of Veterinary Medicine, China

8 Agricultural University, Beijing, China<sup>a</sup>; Department of Animal Nutrition and Management,

9 Swedish University of Agricultural Sciences, Uppsala, Sweden<sup>b</sup>

10  
11 <sup>#</sup>Corresponding author:

12 Yao-Hong Zhu, Department of Veterinary Clinical Sciences, College of Veterinary

13 Medicine, China Agricultural University, 100193 Beijing, P. R. China

14 Tel.: +86 10 6273 1094 Fax: +86 10 6273 1274

15 E-mail: zhu\_yaohong@hotmail.com

16 **Supplementary Information**

17 **Content**

18 **1. Supplementary Figure S1.**

19 **2. Supplementary Figure S2.**

20 **3. Supplementary Figure S3.**

21 **4. Supplementary Table S1.**

22 **5. Supplementary Table S2.**

23 **6. Supplementary Table S3.**

24 **7. Supplementary Table S4.**

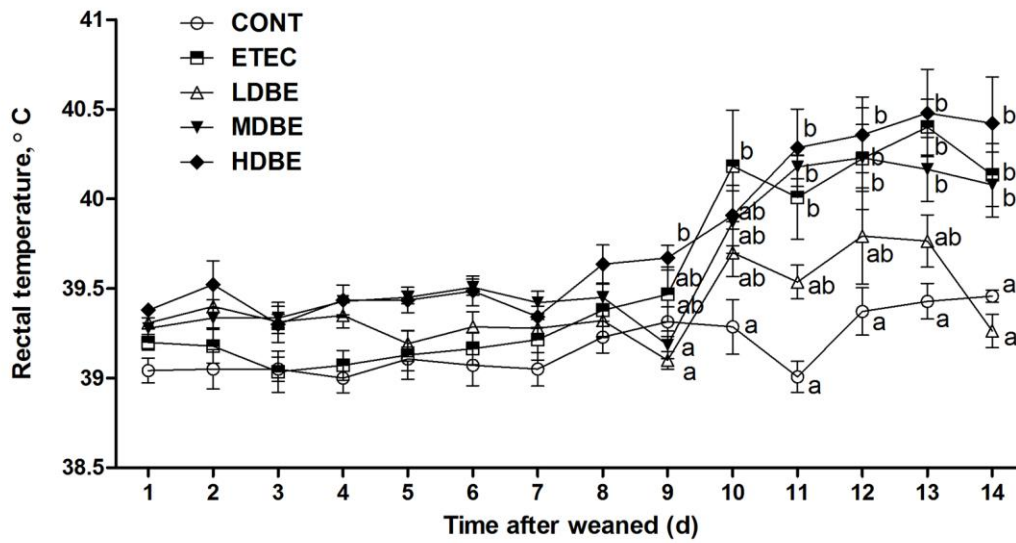

25

26 **Figure S1** Effects of BLS-mix on rectal temperature of newly-weaned piglets following F4<sup>+</sup> ETEC challenge. The *MUC4*

27 RR pigs received sterile physiological saline orally (CONT), sterile physiological saline orally followed by F4<sup>+</sup> ETEC

28 ( $1.0 \times 10^{10}$  CFU/d, p.o.) challenge (ETEC), were pretreated with a low dose of BLS-mix ( $3.9 \times 10^8$  CFU/d, p.o.) for 1

29 week followed by F4<sup>+</sup> ETEC challenge (LDBE), were pretreated with a moderate dose of BLS-mix ( $7.8 \times 10^8$  CFU/d, p.o.)

30 for 1 week followed by F4<sup>+</sup> ETEC challenge (MDBE), or were pretreated with a high dose of BLS-mix ( $3.9 \times 10^9$  CFU/d,

31 p.o.) for 1 week followed by F4<sup>+</sup> ETEC (HDBE). Data are presented as means  $\pm$  SEM (n = 6 per group). Within the same

32 time, mean values with different superscript letters (a, b) are significantly different ( $P < 0.05$ ).

33

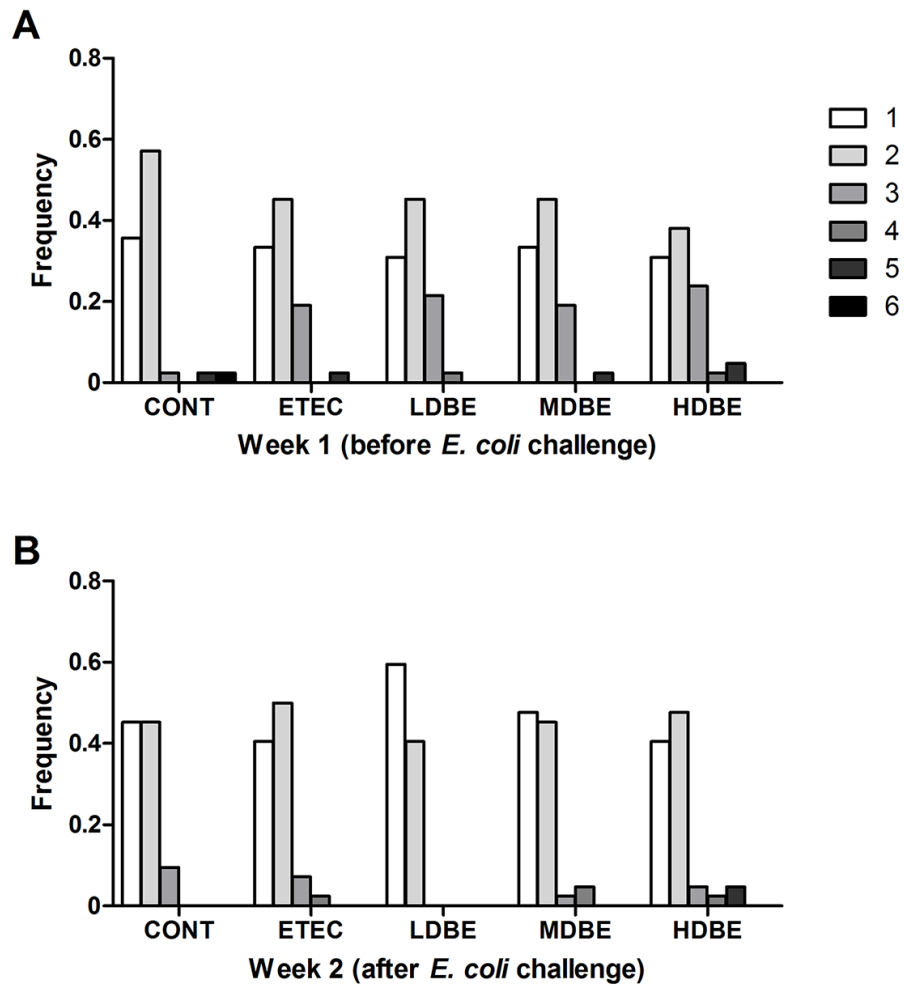

34

35 **Figure S2** Effects of BLS-mix on diarrhea scores of newly-weaned pigs following F4<sup>+</sup> ETEC challenge. The *MUC4* RR  
 36 pigs received sterile physiological saline orally (CONT), sterile physiological saline orally followed by F4<sup>+</sup> ETEC ( $1.0 \times$   
 37  $10^{10}$  CFU/d, p.o.) challenge (ETEC), were pretreated with a low dose of BLS-mix ( $3.9 \times 10^8$  CFU/d, p.o.) for 1 week  
 38 followed by F4<sup>+</sup> ETEC challenge (LDBE), were pretreated with a moderate dose of BLS-mix ( $7.8 \times 10^8$  CFU/d, p.o.) for  
 39 1 week followed by F4<sup>+</sup> ETEC challenge (MDBE), or were pretreated with a high dose of BLS-mix ( $3.9 \times 10^9$  CFU/d,  
 40 p.o.) for 1 week followed by F4<sup>+</sup> ETEC (HDBE).

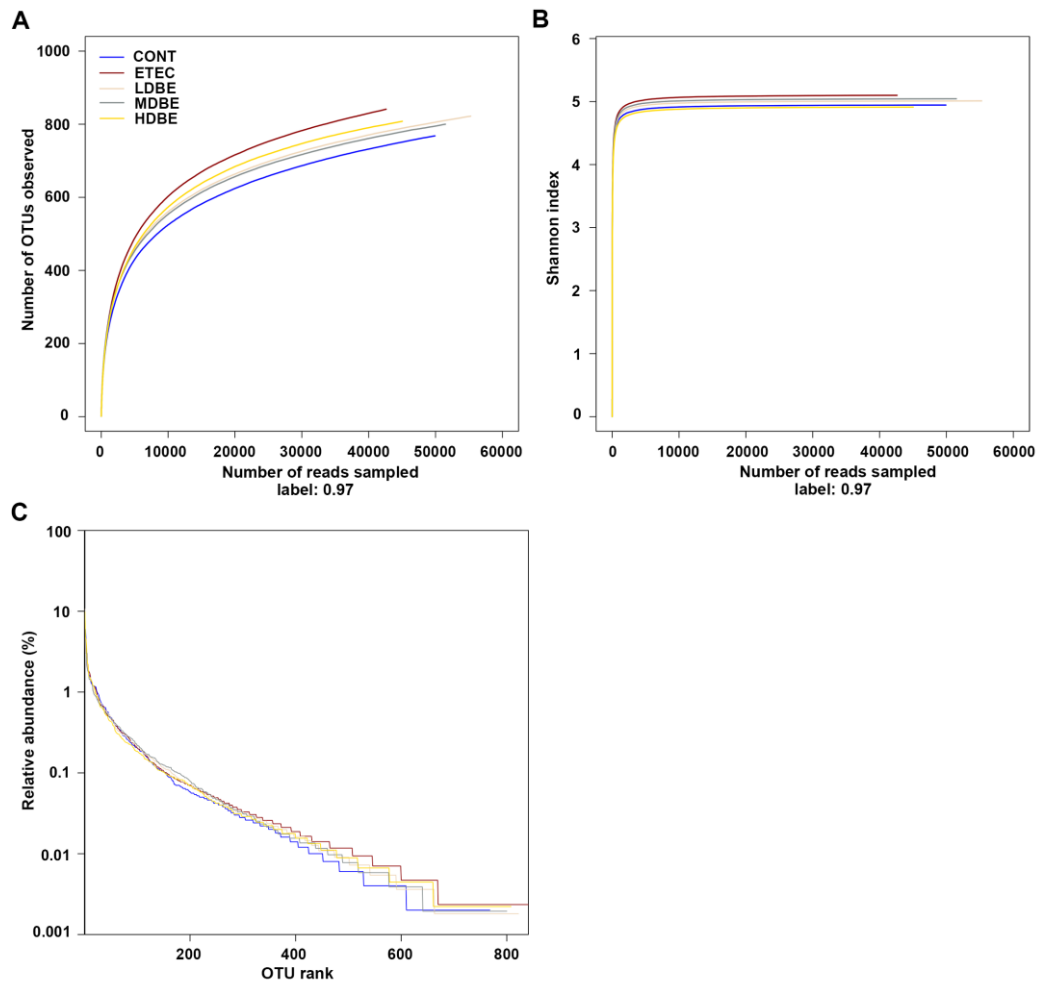

41

42 **Figure S3** Alpha diversity analysis of the colonic microbiota. Rarefaction curves for OTUs (A) and Shannon index (B), as

43 well as rank-abundance curves (C) of average reads within the same group (n = 6 per group) were calculated for reads

44 exhibiting  $\geq 97\%$  sequence identity.

45

46 **Table S1** Effects of oral administration of BLS-mix on the incidence and duration of  
 47 diarrhea in newly weaned pigs before and after F4<sup>+</sup> ETEC challenge.

| Group <sup>a</sup> /item | Pigs    |               |       | Pig days |               |      | Significance of difference |       |       |       |
|--------------------------|---------|---------------|-------|----------|---------------|------|----------------------------|-------|-------|-------|
|                          | At risk | With diarrhea |       | At risk  | With diarrhea |      | ETEC                       | LDBE  | MDBE  | HDBE  |
|                          | (n)     | (n)           | (%)   | (n)      | (n)           | (%)  |                            |       |       |       |
| Week 1                   |         |               |       |          |               |      |                            |       |       |       |
| CONT                     | 6       | 2             | 33.33 | 42       | 2             | 4.76 | 0.084                      | 0.032 | 0.084 | 0.020 |
| ETEC                     | 6       | 1             | 16.67 | 42       | 1             | 2.38 |                            | 0.580 | 1.000 | 0.691 |
| LDBE                     | 6       | 1             | 16.67 | 42       | 1             | 2.38 |                            |       | 0.580 | 0.544 |
| MDBE                     | 6       | 1             | 16.67 | 42       | 1             | 2.38 |                            |       |       | 0.691 |
| HDBE                     | 6       | 2             | 33.33 | 42       | 2             | 4.76 |                            |       |       |       |
| Week 2                   |         |               |       |          |               |      |                            |       |       |       |
| CONT                     | 6       | 0             | 0     | 42       | 0             | 0    | 0.628                      | 0.039 | 0.193 | 0.290 |
| ETEC                     | 6       | 1             | 16.67 | 42       | 1             | 2.38 |                            | 0.058 | 0.630 | 0.558 |
| LDBE                     | 6       | 0             | 0     | 42       | 0             | 0    |                            |       | 0.185 | 0.069 |
| MDBE                     | 6       | 2             | 33.33 | 42       | 2             | 4.76 |                            |       |       | 0.445 |
| HDBE                     | 6       | 3             | 50    | 42       | 3             | 7.14 |                            |       |       |       |

48 <sup>a</sup> Piglets received sterile physiological saline orally (CONT), received sterile physiological saline orally followed by  
 49 F4<sup>+</sup> ETEC challenge ( $1 \times 10^{10}$  CFU/d, per os [p.o.]) (ETEC), were pretreated with a low dose of BLS-mix ( $3.9 \times 10^8$   
 50 CFU/d, p.o.) for 1 week followed by F4<sup>+</sup> ETEC (LDBE), were pretreated with a moderate dose of BLS-mix ( $7.8 \times 10^8$   
 51 CFU/d, p.o.) for 1 week followed by F4<sup>+</sup> ETEC challenge (MDBE) or were pretreated with a high dose of BLS-mix  
 52 ( $3.9 \times 10^9$  CFU/d, p.o.) for 1 week followed by F4<sup>+</sup> ETEC challenge (HDBE).  
 53 n = 6 pigs per group; Pearson's chi-squared test.

54 **Table S2** Effects of oral administration of BLS-mix on the growth of newly weaned pigs  
 55 before and after F4<sup>+</sup> ETEC challenge.

| Item <sup>2</sup>                     | Treatment <sup>1</sup> |                  |                   |                   |                   | SEM  | P-value |
|---------------------------------------|------------------------|------------------|-------------------|-------------------|-------------------|------|---------|
|                                       | CONT                   | ETEC             | LDBE              | MDBE              | HDBE              |      |         |
| Week 1 (days 0 to 8, pre-challenge)   |                        |                  |                   |                   |                   |      |         |
| ADG, g/d                              | 127                    | 136              | 133               | 111               | 112               | 18   | 0.724   |
| ADFI, g/d                             | 159                    | 146              | 145               | 147               | 138               | 13   | 0.872   |
| G:F, g/g                              | 0.80                   | 0.93             | 0.92              | 0.76              | 0.81              | 0.08 | 0.963   |
| Week 2 (days 8 to 15, post-challenge) |                        |                  |                   |                   |                   |      |         |
| ADG, g/d                              | 287 <sup>a</sup>       | 106 <sup>b</sup> | 233 <sup>ab</sup> | 234 <sup>ab</sup> | 214 <sup>ab</sup> | 17   | 0.018   |
| ADFI, g/d                             | 310 <sup>a</sup>       | 218 <sup>b</sup> | 318 <sup>a</sup>  | 324 <sup>a</sup>  | 302 <sup>a</sup>  | 12   | 0.003   |
| G:F, g/g                              | 0.93                   | 0.49             | 0.73              | 0.72              | 0.71              | 0.06 | 0.821   |

56 <sup>1</sup> Piglets received sterile physiological saline orally (CONT), received sterile physiological saline orally followed by  
 57 F4<sup>+</sup> ETEC challenge ( $1 \times 10^{10}$  CFU/d, p.o.) (ETEC), were pretreated with a low dose of BLS-mix ( $3.9 \times 10^8$  CFU/d,  
 58 p.o.) for 1 week followed by F4<sup>+</sup> ETEC challenge (LDLE), were pretreated with a moderate dose of BLS-mix ( $7.8 \times$   
 59  $10^8$  CFU/d, p.o.) for 1 week followed by F4<sup>+</sup> ETEC challenge (MDBE) or were pretreated with a high dose of  
 60 BLS-mix ( $3.9 \times 10^9$  CFU/d, p.o.) for 1 week followed by F4<sup>+</sup> ETEC challenge (HDBE). n = 6 per group.

61 <sup>a, b</sup> Within a row, least-square means without a common lowercase superscript differ ( $P < 0.05$ ); Tukey's test.

62 <sup>2</sup> ADG, average daily gain; ADFI, average daily feed intake; G: F, gain to feed ratio.

63

64 **Table S3** Relative abundance (%) of the predominant taxa in the colonic content microbiota of  
 65 pigs.

| Level                                                        | Treatment <sup>a</sup> |       |       |       |        |
|--------------------------------------------------------------|------------------------|-------|-------|-------|--------|
|                                                              | CONT                   | ETEC  | LDBE  | MDBE  | HDBE   |
| <b>Phylum</b>                                                |                        |       |       |       |        |
| Bacteroidetes                                                | 61.00                  | 52.60 | 59.60 | 59.20 | 57.80  |
| Firmicutes                                                   | 29.50                  | 32.40 | 31.90 | 27.90 | 27.600 |
| Spirochaetae                                                 | 3.55                   | 6.85  | 5.34  | 6.38  | 5.55   |
| Tenericutes                                                  | 2.45                   | 1.83  | 0.78  | 0.75  | 1.23   |
| Proteobacteria                                               | 1.41                   | 3.48  | 1.30  | 3.56  | 4.22   |
| <b>Phylum. Class</b>                                         |                        |       |       |       |        |
| Bacteroidetes. Bacteroidia                                   | 60.50                  | 50.80 | 59.20 | 57.40 | 57.50  |
| Firmicutes. Clostridia                                       | 26.10                  | 30.30 | 28.90 | 24.40 | 24.00  |
| Spirochaetae. Spirochaetes                                   | 3.55                   | 6.85  | 5.34  | 6.38  | 5.55   |
| Tenericutes. Mollicutes                                      | 2.45                   | 1.83  | 0.78  | 0.75  | 1.23   |
| Firmicutes. Erysipelotrichia                                 | 1.72                   | 0.98  | 2.09  | 1.22  | 1.47   |
| Firmicutes. Negativicutes                                    | 1.38                   | 0.92  | 0.64  | 1.75  | 1.69   |
| <b>Phylum. Class. Order</b>                                  |                        |       |       |       |        |
| Bacteroidetes. Bacteroidia. Bacteroidales                    | 60.50                  | 50.80 | 59.20 | 57.40 | 57.50  |
| Firmicutes. Clostridia. Clostridiales                        | 26.10                  | 30.20 | 28.90 | 24.40 | 24.00  |
| Spirochaetae. Spirochaetes. Spirochaetales                   | 3.55                   | 6.85  | 5.34  | 6.38  | 5.55   |
| Tenericutes. Mollicutes. RF9                                 | 2.45                   | 1.82  | 0.78  | 0.73  | 1.21   |
| Firmicutes. Erysipelotrichia.<br>Erysipelotrichales          | 1.72                   | 0.98  | 2.09  | 1.22  | 1.47   |
| Firmicutes. Negativicutes. Selenomonadales                   | 1.38                   | 0.92  | 0.64  | 1.75  | 1.69   |
| <b>Class. Order. Family</b>                                  |                        |       |       |       |        |
| Bacteroidia. Bacteroidales. Prevotellaceae                   | 47.40                  | 35.90 | 43.50 | 39.70 | 41.10  |
| Clostridia. Clostridiales. Ruminococcaceae                   | 14.20                  | 17.10 | 15.40 | 14.10 | 12.90  |
| Clostridia. Clostridiales. Lachnospiraceae                   | 9.96                   | 9.22  | 9.87  | 7.63  | 7.49   |
| Bacteroidia. Bacteroidales. Rikenellaceae                    | 5.63                   | 2.06  | 5.20  | 4.02  | 1.18   |
| Bacteroidia. Bacteroidales. S24-7                            | 4.08                   | 6.00  | 6.23  | 5.73  | 7.75   |
| Spirochaetes. Spirochaetales.<br>Spirochaetaceae             | 3.55                   | 6.85  | 5.34  | 6.38  | 5.55   |
| Bacteroidia. Bacteroidales.<br>Porphyromonadaceae            | 2.53                   | 4.54  | 2.30  | 4.60  | 6.04   |
| Erysipelotrichia. Erysipelotrichales.<br>Erysipelotrichaceae | 1.72                   | 0.98  | 2.09  | 1.22  | 1.47   |
| Negativicutes. Selenomonadales.<br>Acidaminococcaceae        | 1.23                   | 0.73  | 0.56  | 1.39  | 1.43   |

| Order. Family. Genus                                |       |       |       |       |       |
|-----------------------------------------------------|-------|-------|-------|-------|-------|
| Bacteroidales. Prevotellaceae. <i>Prevotella</i>    | 29.14 | 23.48 | 27.70 | 28.14 | 29.84 |
| Bacteroidales. Prevotellaceae.                      | 14.85 | 8.66  | 12.71 | 9.34  | 8.72  |
| uncultured                                          |       |       |       |       |       |
| Clostridiales. Ruminococcaceae. uncultured          | 6.16  | 7.38  | 6.62  | 5.35  | 5.18  |
| Bacteroidales. Rikenellaceae.                       | 5.62  | 1.88  | 5.19  | 3.98  | 1.11  |
| <i>RC9_gut_group</i>                                |       |       |       |       |       |
| Bacteroidales. S24-7. norank                        | 4.08  | 5.98  | 6.23  | 5.73  | 7.75  |
| Bacteroidales. Porphyromonadaceae.                  | 2.52  | 4.32  | 2.21  | 4.57  | 5.91  |
| <i>Parabacteroides</i>                              |       |       |       |       |       |
| Spirochaetales. Spirochaetaceae. <i>Spirochaeta</i> | 2.45  | 3.75  | 3.50  | 2.70  | 3.09  |
| Selenomonadales. Acidaminococcaceae.                | 1.22  | 0.73  | 0.56  | 1.39  | 1.43  |
| <i>Phascolarctobacterium</i>                        |       |       |       |       |       |
| Clostridiales. Ruminococcaceae.                     | 1.22  | 1.02  | 1.33  | 1.21  | 1.10  |
| <i>Faecalibacterium</i>                             |       |       |       |       |       |
| Clostridiales. Ruminococcaceae.                     | 1.16  | 1.66  | 1.67  | 1.11  | 1.01  |
| <i>Incertae_Sedis</i>                               |       |       |       |       |       |
| Spirochaetales. Spirochaetaceae. <i>Treponema</i>   | 1.10  | 3.09  | 1.86  | 3.62  | 2.50  |
| Clostridiales. Ruminococcaceae.                     | 1.06  | 1.41  | 1.02  | 1.64  | 1.24  |
| <i>Subdoligranulum</i>                              |       |       |       |       |       |
| Clostridiales. Ruminococcaceae. <i>Oscillospira</i> | 1.00  | 0.90  | 0.66  | 1.20  | 0.88  |

66 <sup>a</sup> Piglets received sterile physiological saline orally (CONT), received sterile physiological saline orally followed by F4<sup>+</sup>  
67 ETEC challenge ( $1 \times 10^{10}$  CFU/d, p.o.) (ETEC), were pretreated with a low dose of BLS-mix ( $3.9 \times 10^8$  CFU/d, p.o.) for  
68 1 week followed by F4<sup>+</sup> ETEC challenge (LDLE), were pretreated with a moderate dose of BLS-mix ( $7.8 \times 10^8$  CFU/d,  
69 p.o.) for 1 week followed by F4<sup>+</sup> ETEC challenge (MDBE) or were pretreated with a high dose of BLS-mix ( $3.9 \times 10^9$   
70 CFU/d, p.o.) for 1 week followed by F4<sup>+</sup> ETEC challenge (HDBE).



71 **Table S4** Order.family.genus taxa alteration of the colonic microbiota in response to F4<sup>+</sup> ETEC infection and BLS-mix intervention (relative  
 72 abundance, %).

| Bacterial taxa       | Mean ±SEM |        |        |        |        | One-way<br>analysis<br>of<br>variance | Tukey's multiple comparison test |          |          |          |          |          |          |          |          |          |
|----------------------|-----------|--------|--------|--------|--------|---------------------------------------|----------------------------------|----------|----------|----------|----------|----------|----------|----------|----------|----------|
|                      | CONT      | ETEC   | LDBE   | MDBE   | HDBE   |                                       | C                                | C        | C        | C        | E        | E        | E        | L        | L        | M        |
|                      | (C)       | (E)    | (L)    | (M)    | (H)    |                                       | vs.<br>E                         | vs.<br>L | vs.<br>M | vs.<br>H | vs.<br>L | vs.<br>M | vs.<br>H | vs.<br>M | vs.<br>H | vs.<br>H |
| Bacteroidales.       | 0.0575    | 0.0953 | 0.3149 | 0.5772 | 0.1243 | <i>P</i> = 0.017                      | NS                               | NS       | 0.023    | NS       | NS       | 0.040    | NS       | NS       | NS       | NS       |
| RF16.                | ±         | ±      | ±      | ±      | ±      |                                       |                                  |          |          |          |          |          |          |          |          |          |
| Norank               | 0.0117    | 0.0306 | 0.1348 | 0.2032 | 0.0482 |                                       |                                  |          |          |          |          |          |          |          |          |          |
| Lactobacillales.     | 0.0758    | 0.0458 | 0.0916 | 0.4281 | 0.2800 | <i>P</i> = 0.019                      | NS                               | NS       | NS       | NS       | NS       | 0.034    | NS       | NS       | NS       | NS       |
| Lactobacillaceae.    | ±         | ±      | ±      | ±      | ±      |                                       |                                  |          |          |          |          |          |          |          |          |          |
| <i>Lactobacillus</i> | 0.0079    | 0.0086 | 0.0283 | 0.1639 | 0.0996 |                                       |                                  |          |          |          |          |          |          |          |          |          |
| Clostridiales.       | 0.7093    | 0.6249 | 1.7069 | 1.1423 | 0.8678 | <i>P</i> = 0.021                      | NS                               | 0.041    | NS       | NS       | 0.023    | NS       | NS       | NS       | NS       | NS       |
| Clostridiaceae.      | ±         | ±      | ±      | ±      | ±      |                                       |                                  |          |          |          |          |          |          |          |          |          |
| <i>Clostridium</i>   | 0.0880    | 0.1302 | 0.3242 | 0.2653 | 0.2671 |                                       |                                  |          |          |          |          |          |          |          |          |          |
| Clostridiales.       | 0.0025    | 0.0019 | 0.0082 | 0.0032 | 0.0018 | <i>P</i> = 0.019                      | NS                               | NS       | NS       | NS       | 0.030    | NS       | NS       | NS       | 0.027    | NS       |
| Lachnospiraceae.     | ±         | ±      | ±      | ±      | ±      |                                       |                                  |          |          |          |          |          |          |          |          |          |
| <i>Howardella</i>    | 0.0014    | 0.0006 | 0.0022 | 0.0011 | 0.0011 |                                       |                                  |          |          |          |          |          |          |          |          |          |

|                            |        |        |        |        |        |             |       |    |    |       |       |       |       |       |       |    |
|----------------------------|--------|--------|--------|--------|--------|-------------|-------|----|----|-------|-------|-------|-------|-------|-------|----|
| Clostridiales.             | 0.0413 | 0.0111 | 0.0184 | 0.0204 | 0.0034 | $P = 0.034$ | NS    | NS | NS | 0.034 | NS    | NS    | NS    | NS    | NS    | NS |
| Lachnospiraceae.           | ±      | ±      | ±      | ±      | ±      |             |       |    |    |       |       |       |       |       |       |    |
| <i>Lachnospira</i>         | 0.0179 | 0.0045 | 0.0027 | 0.0043 | 0.0012 |             |       |    |    |       |       |       |       |       |       |    |
| Clostridiales.             | 0.8652 | 1.2573 | 0.5217 | 0.5338 | 0.6001 | $P = 0.009$ | NS    | NS | NS | NS    | 0.015 | 0.018 | 0.036 | NS    | NS    | NS |
| Lachnospiraceae.           | ±      | ±      | ±      | ±      | ±      |             |       |    |    |       |       |       |       |       |       |    |
| Uncultured                 | 0.2132 | 0.2150 | 0.0392 | 0.1365 | 0.0362 |             |       |    |    |       |       |       |       |       |       |    |
| Clostridiales.             | 0      | 0.0017 | 0.0003 | 0      | 0      | $P = 0.019$ | 0.035 | NS | NS | NS    | NS    | 0.035 | 0.035 | NS    | NS    | NS |
| Ruminococcaceae.           | ±      | ±      | ±      | ±      | ±      |             |       |    |    |       |       |       |       |       |       |    |
| <i>Acetanaerobacterium</i> | 0      | 0.0008 | 0.0003 | 0      | 0      |             |       |    |    |       |       |       |       |       |       |    |
| Clostridiales.             | 0      | 0.0039 | 0.0010 | 0.0010 | 0.0018 | $P = 0.024$ | 0.014 | NS | NS | NS    | NS    | NS    | NS    | NS    | NS    | NS |
| Ruminococcaceae.           | ±      | ±      | ±      | ±      | ±      |             |       |    |    |       |       |       |       |       |       |    |
| <i>Sporobacter</i>         | 0      | 0.0012 | 0.0007 | 0.0007 | 0.0009 |             |       |    |    |       |       |       |       |       |       |    |
| Erysipelotrichales.        | 0.0011 | 0      | 0.0026 | 0      | 0.0006 | $P = 0.002$ | NS    | NS | NS | NS    | 0.002 | NS    | NS    | 0.002 | 0.025 | NS |
| Erysipelotrichaceae.       | ±      | ±      | ±      | ±      | ±      |             |       |    |    |       |       |       |       |       |       |    |
| <i>Turicibacter</i>        | 0.0005 | 0      | 0.0006 | 0      | 0.0006 |             |       |    |    |       |       |       |       |       |       |    |

73 C, CONT; E, ETEC; L, LDBE, M, MDBE; H, HDBE; NS, no significance.
